# Supplementary material for: Role of Cytosolic Malic Enzyme in Oleaginicity of High-Lipid-Producing Fungal Strain Mucor circinelloides WJ11
Source: MDPI journal article supplement (doi:10.3390/jof8030265), 2022-03-05
Supplement: s1 [file s1]

**Table S1.** Sequences of primers utilized in this study.

| Primer name                   | Primer sequence (5'-3')                                                |
|-------------------------------|------------------------------------------------------------------------|
| <i>cmalA</i> -1F- <i>XhoI</i> | CAAAATAACTAAATTACGTAGCTAGC <u>CTCGAGAT</u> GGATCCTGCTAAACGT<br>CAAAGAC |
| <i>cmalA</i> -1R- <i>XhoI</i> | CTCATCTTTCCCTGTCTGC <u>CTCGAG</u> CTACAATTTACCAGCTTGCTG                |
| <i>cmalB</i> -1F- <i>XhoI</i> | CAAAATAACTAAATtACGTAGCTAGC <u>CTCGAGAT</u> GGCTCCTTCATCCTACA<br>TTGC   |
| <i>cmalB</i> -1R- <i>XhoI</i> | CTCATCTTTCCCTGTCTGC <u>CTCGAG</u> CTAAATAGAGGATGGCAAGGATCCG            |
| 1F                            | GATAAGCATAAACCAGATCTG C                                                |
| 1R                            | GAGATCTCGACGTATTCAGCG                                                  |
| 2F                            | GAAAGAGAATCAAGTGTCTCC                                                  |
| 2R                            | GTATCTGACATAGTCGAGCTTG                                                 |
| 3F                            | ATACTTCCAAGCTGAGTTTG                                                   |
| 3R                            | GTATCTGACATAGTCGAGCTTG                                                 |
| <i>cmalA</i> qPCR-F           | TCAAAAAGCTCGCGCCCTCA                                                   |
| <i>cmalA</i> qPCR-R           | AGGGGCAGCCAAGAAGGGAT                                                   |
| <i>cmalB</i> qPCR-F           | TCAACCGTCTTGCCGCCATT                                                   |
| <i>cmalB</i> qPCR-R           | TAGGCTTAGCCAACACGCCG                                                   |
| Actin-F                       | GATGAAGCCCAATCCAAGAGAGGT                                               |
| Actin-R                       | TCTTCTCCGTTGGACTIONGGG                                                 |

\* Restriction enzyme sites (6 bp nucleotides) are underlined.
